# Supplementary material for: Performance enhancement of a dye-sensitized solar cell by peripheral aromatic and heteroaromatic functionalization in di-branched organic sensitizers
Source: Royal Society of Chemistry journal article supplement (doi:10.1039/c7nj05188c), 2018-01-01

# Performance enhancement of dye-sensitized solar cell by peripheral aromatic and heteroaromatic functionalization in di-branched organic sensitizers

N. Manfredi, V. Trifiletti, F. Melchiorre, G. Giannotta, P. Biagini, and A. Abboto.

## Electronic Supplementary Information

### Table of contents

|                                                                                                                                                                                                                                  |          |
|----------------------------------------------------------------------------------------------------------------------------------------------------------------------------------------------------------------------------------|----------|
| <b>Figure S1. Normalized absorption (spectra of the investigated dyes adsorbed onto a 2.5 <math>\mu\text{m}</math> transparent <math>\text{TiO}_2</math> film.....</b>                                                           | <b>2</b> |
| <b>Figure S2. Normalized absorption (solid line) and emission (dashed line) spectra of the investigated dyes in EtOH solution.....</b>                                                                                           | <b>3</b> |
| <b>Figure S3. Cyclic voltammetry (CV) plots of the investigated dyes in <math>\text{TBABF}_4</math> 0.1 M in DMF solution.....</b>                                                                                               | <b>3</b> |
| <b>Table S1: Main photovoltaic parameters of DSSCs based on the di-branched sensitizer TT-b-02, varying the electrolyte and the chenodeoxycholic acid (CDCA) amount in the <math>2 \times 10^{-4}</math> M dye solution.....</b> | <b>3</b> |
| <b>Table S2: Main photovoltaic parameters of DSSCs based on the di-branched sensitizers at different time.....</b>                                                                                                               | <b>4</b> |
| <b><math>^1\text{H}</math> and <math>^{13}\text{C}</math> NMR spectra .....</b>                                                                                                                                                  | <b>5</b> |

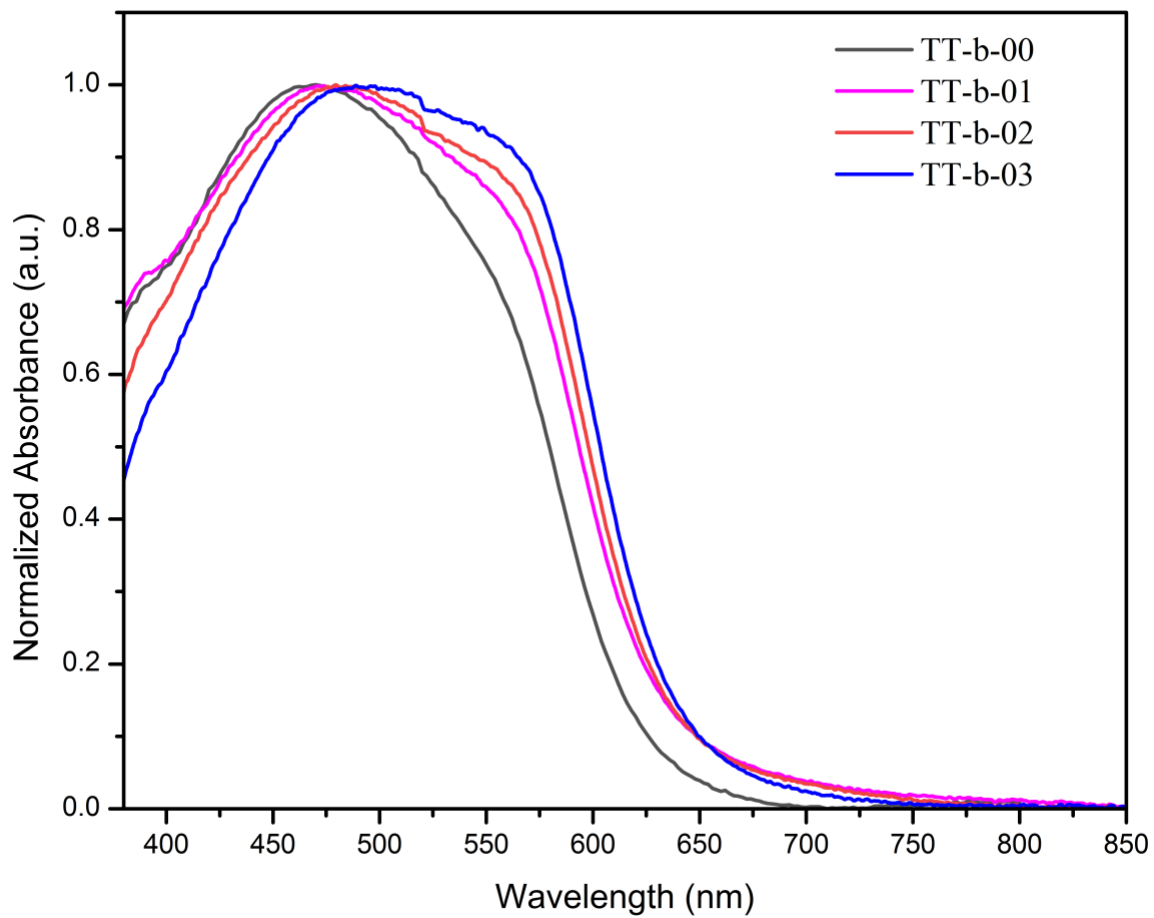

**Figure S1.** Normalized absorption (spectra of the investigated dyes adsorbed onto a 2.5  $\mu\text{m}$  transparent  $\text{TiO}_2$  film).

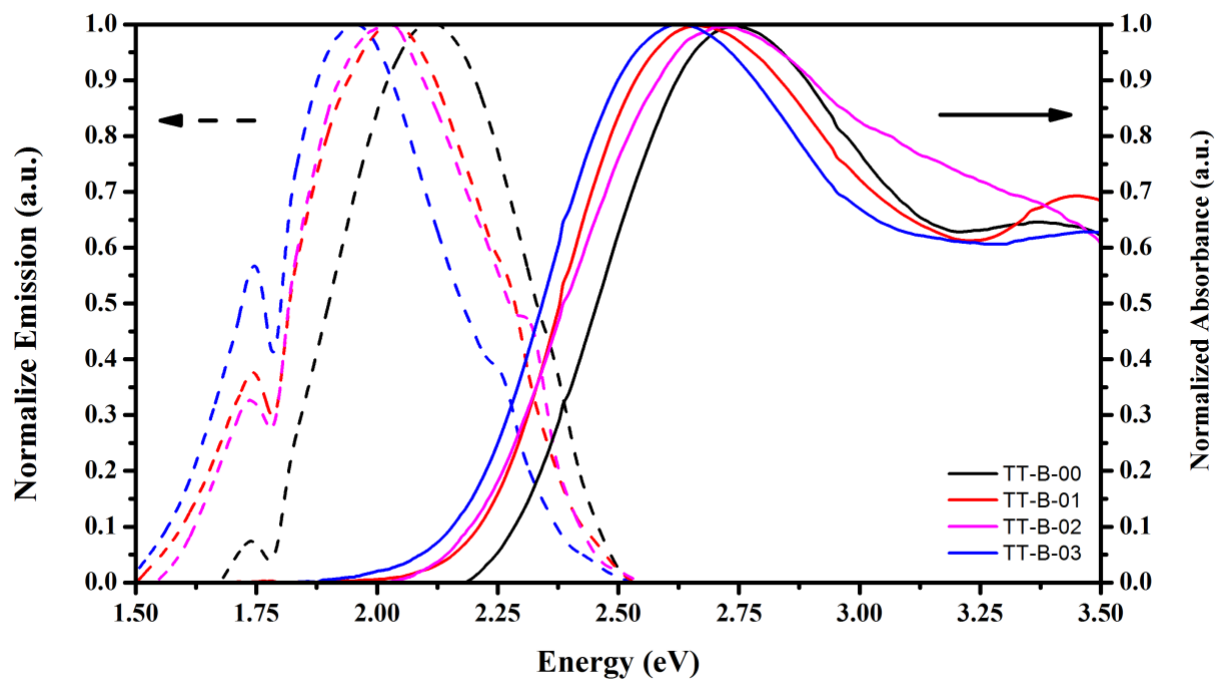

**Figure S2.** Normalized absorption (solid line) and emission (dashed line) spectra of the investigated dyes in EtOH solution.

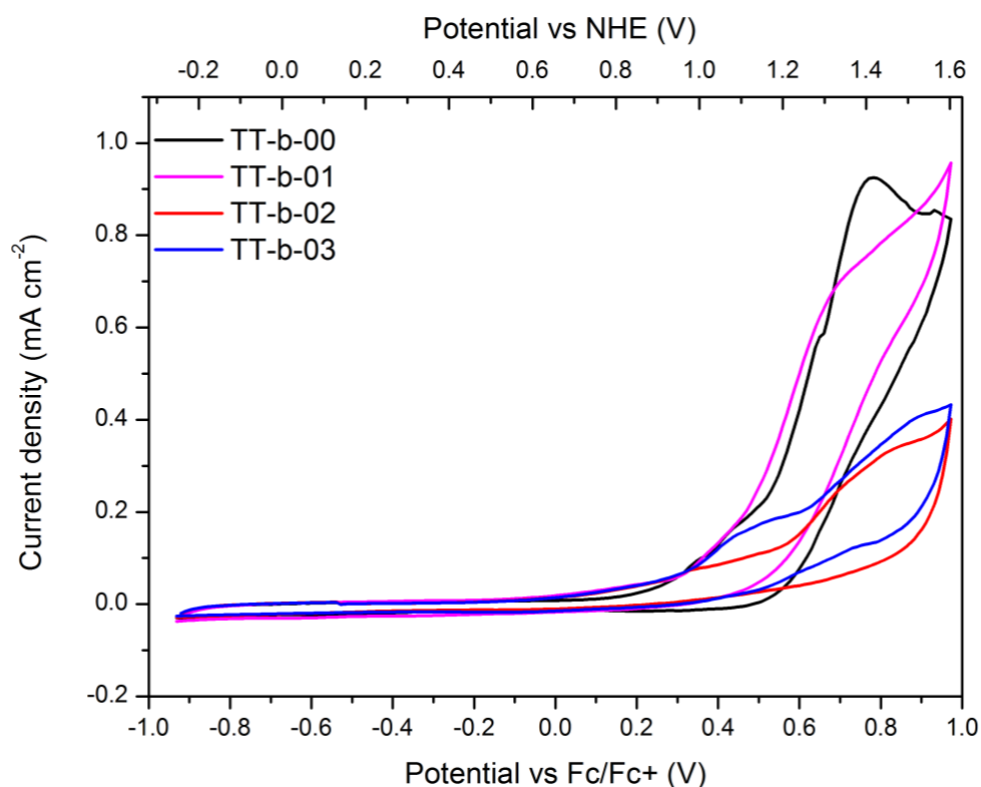

**Figure S3.** Cyclic voltammetry (CV) plots of the investigated dyes in TBABF<sub>4</sub> 0.1 M in DMF solution.

**Table S1:** Main photovoltaic parameters of DSSCs based on the di-branched sensitizer **TT-b-02**, varying the electrolyte and the chenodeoxycholic acid (**CDCA**) amount in the  $2 \times 10^{-4}$  M dye solution.

| Electrolyte       | CDCA (M)           | $J_{sc}$ (mA cm <sup>-2</sup> ) | $V_{oc}$ (mV) | FF   | PCE (%) |
|-------------------|--------------------|---------------------------------|---------------|------|---------|
| Z959 <sup>a</sup> | 0                  | 14.0                            | 624           | 0.70 | 6.1     |
| Z960 <sup>b</sup> | 0                  | 12.7                            | 664           | 0.68 | 5.7     |
| Z959 <sup>a</sup> | $2 \times 10^{-4}$ | 15.9                            | 663           | 0.59 | 6.2     |
| Z960 <sup>b</sup> | $2 \times 10^{-4}$ | 15.6                            | 645           | 0.62 | 6.3     |
| Z959 <sup>a</sup> | $2 \times 10^{-3}$ | 12.9                            | 628           | 0.71 | 5.8     |
| Z960 <sup>b</sup> | $2 \times 10^{-3}$ | 12.8                            | 678           | 0.70 | 6.1     |
| Z959 <sup>a</sup> | $2 \times 10^{-2}$ | 12.6                            | 619           | 0.72 | 5.6     |
| Z960 <sup>b</sup> | $2 \times 10^{-2}$ | 12.9                            | 678           | 0.71 | 6.2     |

<sup>a</sup> 1.0 M DMII, 0.03 M I<sub>2</sub>, 0.1 M GSCN, 0.5 M TBP in ACN/VN=85/15; <sup>b</sup> 1.0 M DMII, 0.03 M I<sub>2</sub>, 0.05 LiI, 0.1 M GSCN, 0.5 M TBP in ACN/VN=85/15.

**Table S2:** Main photovoltaic parameters of DSSCs based on the di-branched sensitizers recorded at different time.

| Dye <sup>a</sup> | Time   | J <sub>sc</sub> (mA cm <sup>-2</sup> ) | V <sub>oc</sub> (mV) | FF   | PCE (%) |
|------------------|--------|----------------------------------------|----------------------|------|---------|
| <b>TT-b-00</b>   | 3 h    | 11.5                                   | 625                  | 0.60 | 4.3     |
|                  | 24 h   | 11.3                                   | 629                  | 0.60 | 4.3     |
|                  | 7 days | 10.9                                   | 631                  | 0.58 | 4.0     |
| <b>TT-b-01</b>   | 3 h    | 14.3                                   | 628                  | 0.62 | 5.6     |
|                  | 24 h   | 14.2                                   | 630                  | 0.63 | 5.6     |
|                  | 7 days | 13.8                                   | 633                  | 0.64 | 5.6     |
| <b>TT-b-02</b>   | 3 h    | 15.6                                   | 645                  | 0.62 | 6.2     |
|                  | 24 h   | 15.5                                   | 644                  | 0.63 | 6.3     |
|                  | 7 days | 14.8                                   | 650                  | 0.64 | 6.2     |
| <b>TT-b-03</b>   | 3 h    | 12.5                                   | 627                  | 0.71 | 5.6     |
|                  | 24 h   | 12.4                                   | 625                  | 0.70 | 5.4     |
|                  | 7 days | 11.9                                   | 630                  | 0.71 | 5.3     |

<sup>a</sup>Dye solution: 2 x 10<sup>-4</sup> M in EtOH + 2 x 10<sup>-4</sup> M CDCA

# <sup>1</sup>H and <sup>13</sup>C NMR spectra

3764.75  
3256.08  
3207.91  
3071.67  
2666.66  
2664.39  
3056.03  
3048.50  
3024.46  
3619.33  
3593.12  
3585.56  
3571.00  
3562.35  
3555.50  
3548.25  
3541.77

500 MHz in CDCl<sub>3</sub>

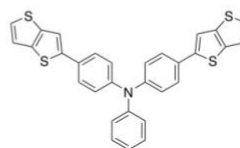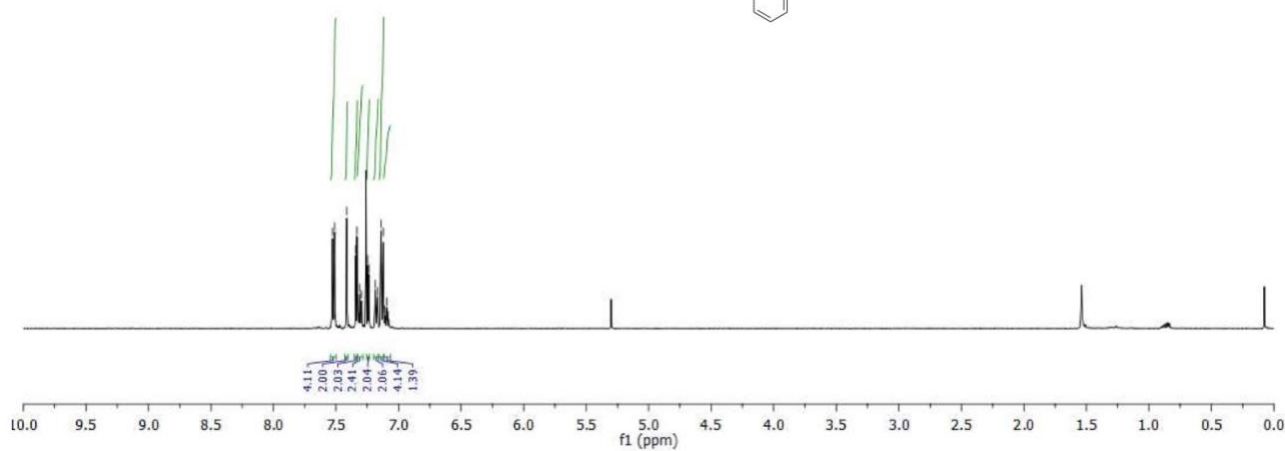

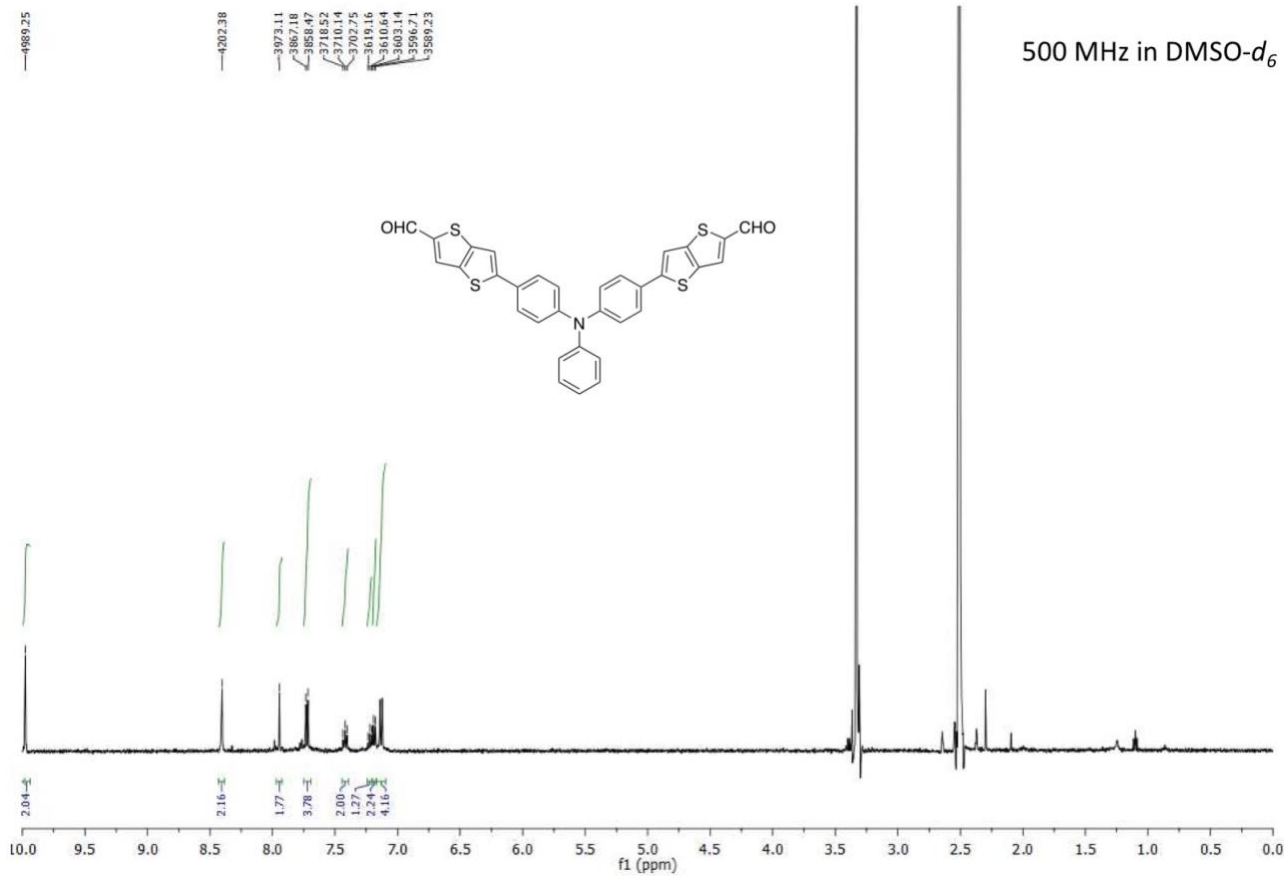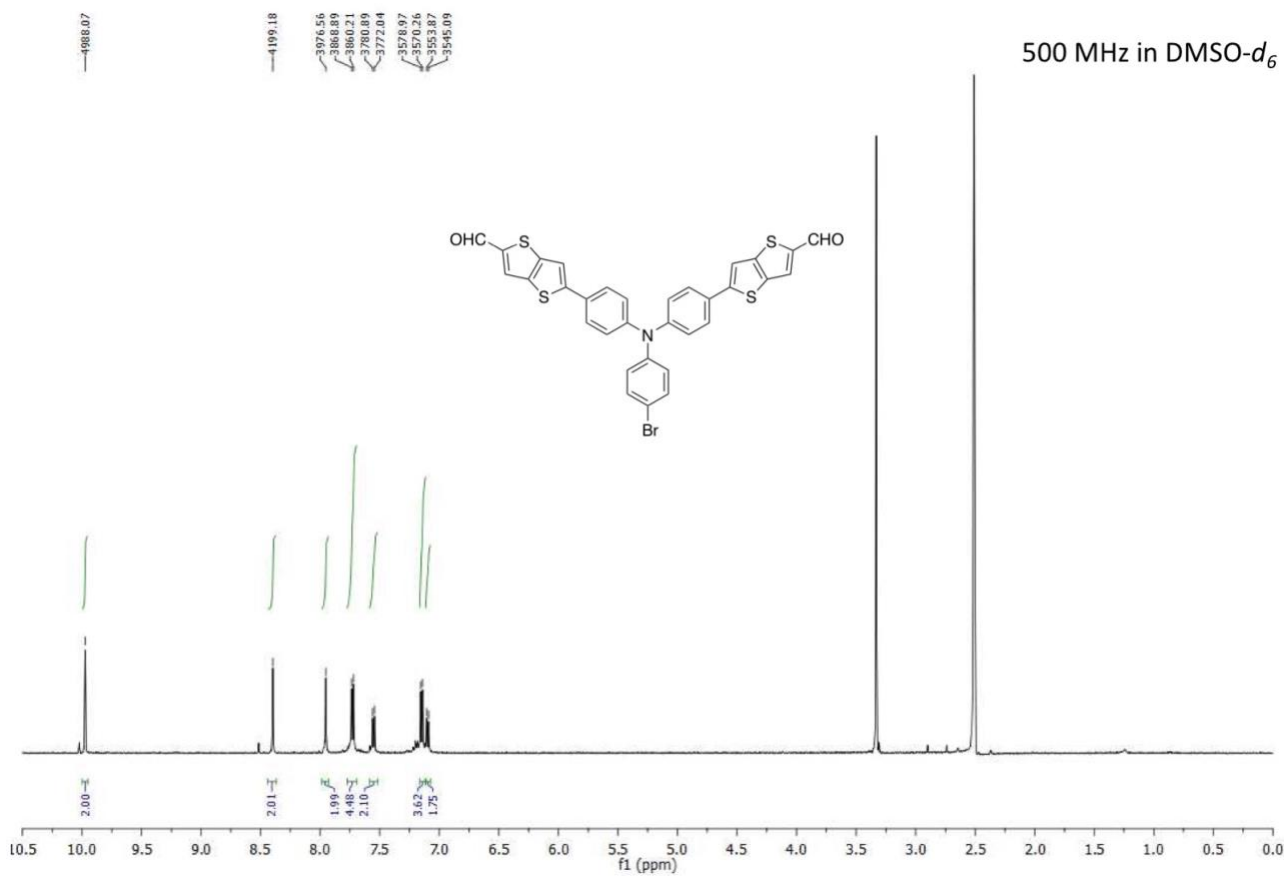

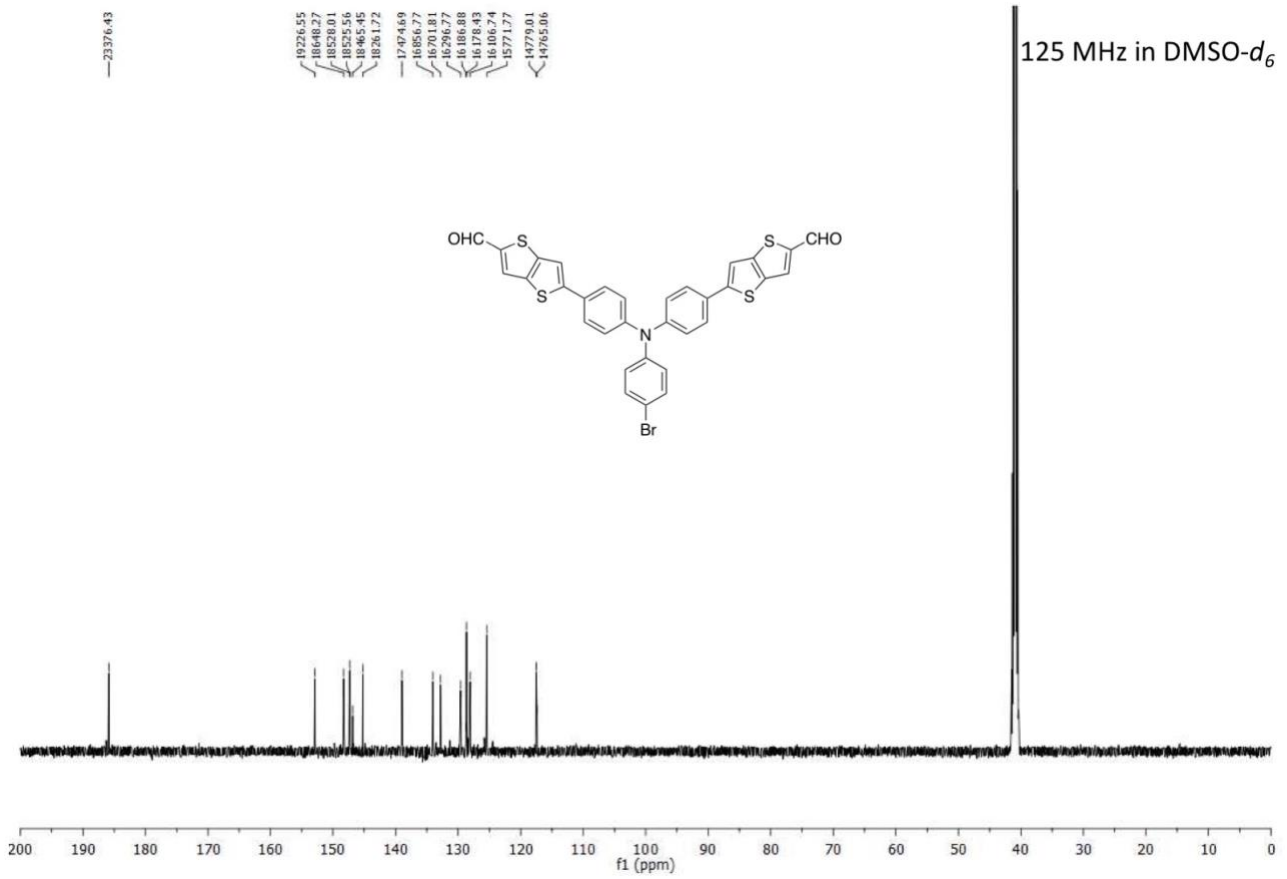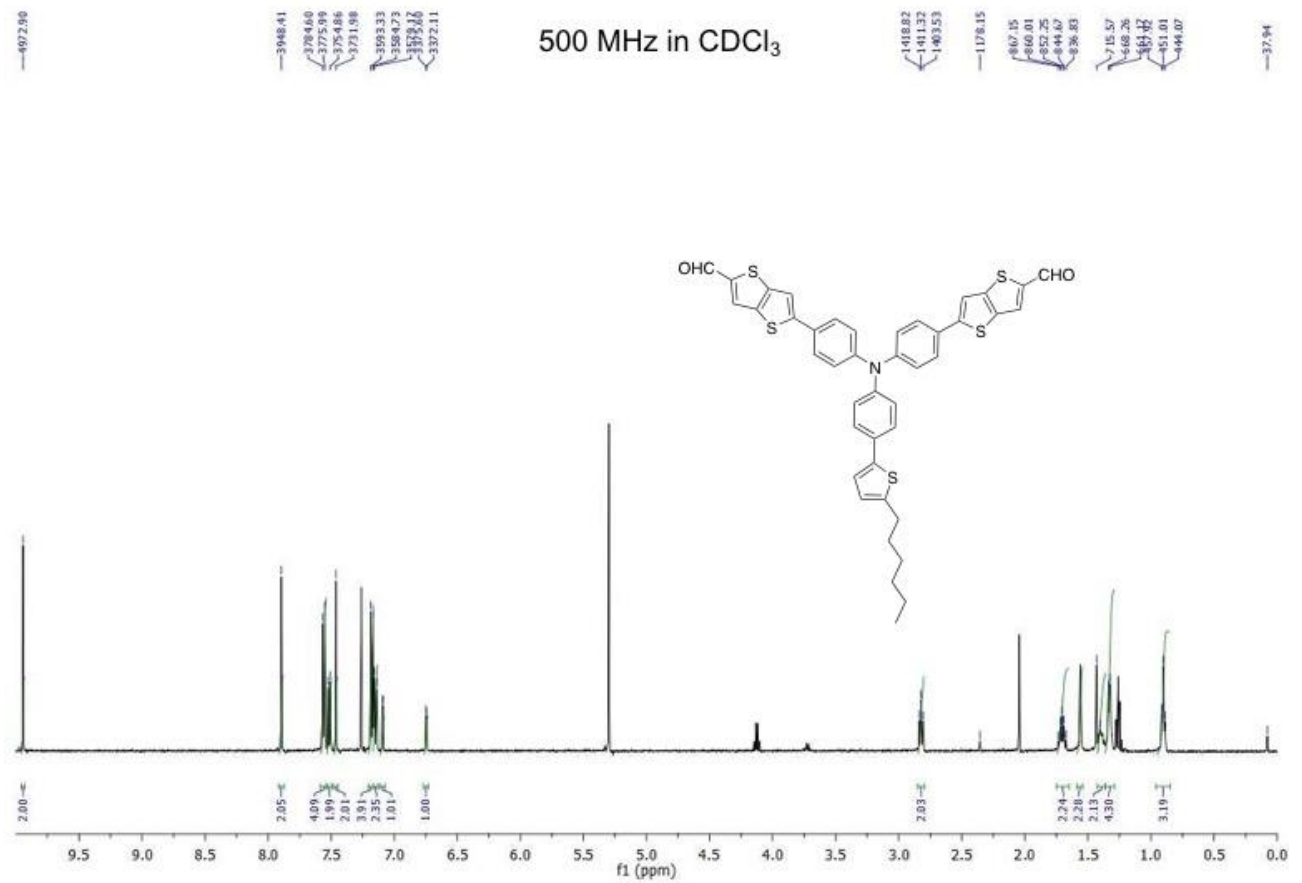

125 MHz in CDCl<sub>3</sub>

182.99  
152.63  
147.68  
147.01  
145.73  
144.30  
140.84  
137.74  
128.34  
127.23  
126.62  
125.60  
113.95

31.58  
31.56  
30.25  
28.74  
22.55  
14.05

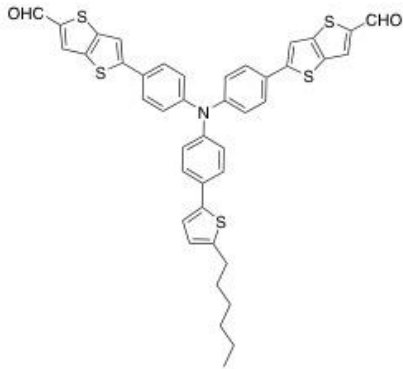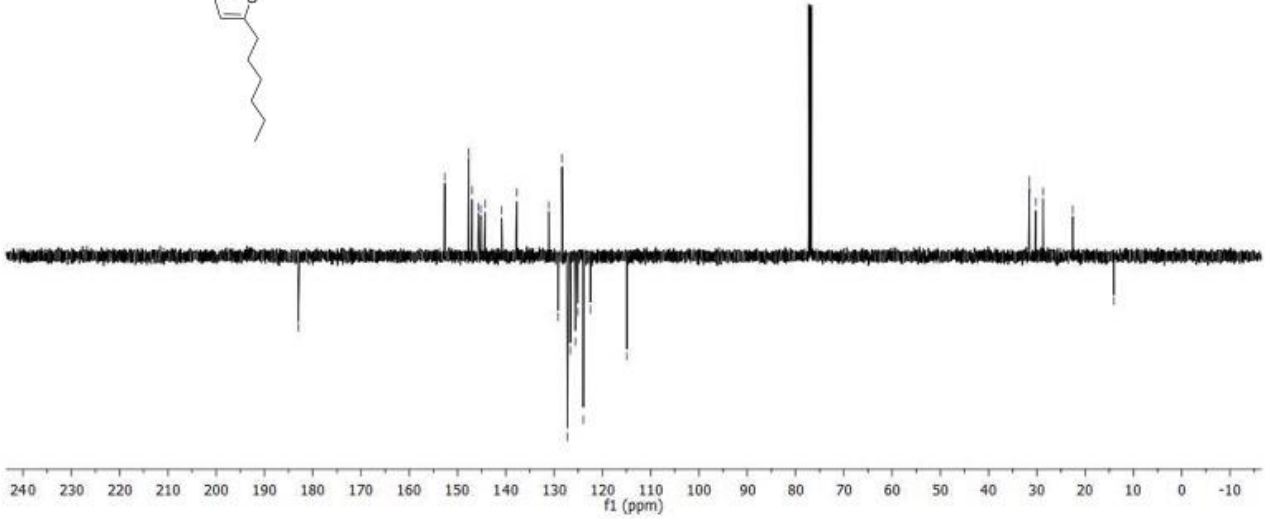

500 MHz in CDCl<sub>3</sub>

9976.15  
3953.93  
3291.50  
3282.83  
3278.87  
3031.38  
3001.19  
3002.51  
3009.82  
3002.88  
3002.88  
3006.33

1.983.39  
1.90.82  
1.393.21

7.13.84  
6.96.76  
6.65.53  
6.61.85  
6.58.46  
6.51.20  
6.56.37  
6.49.43  
6.40.40

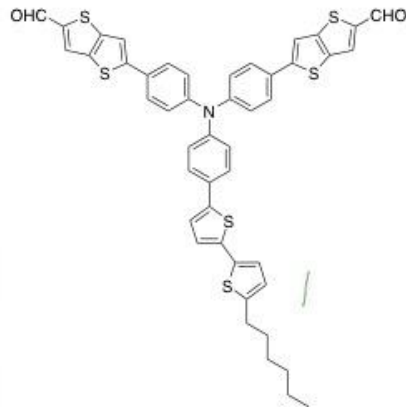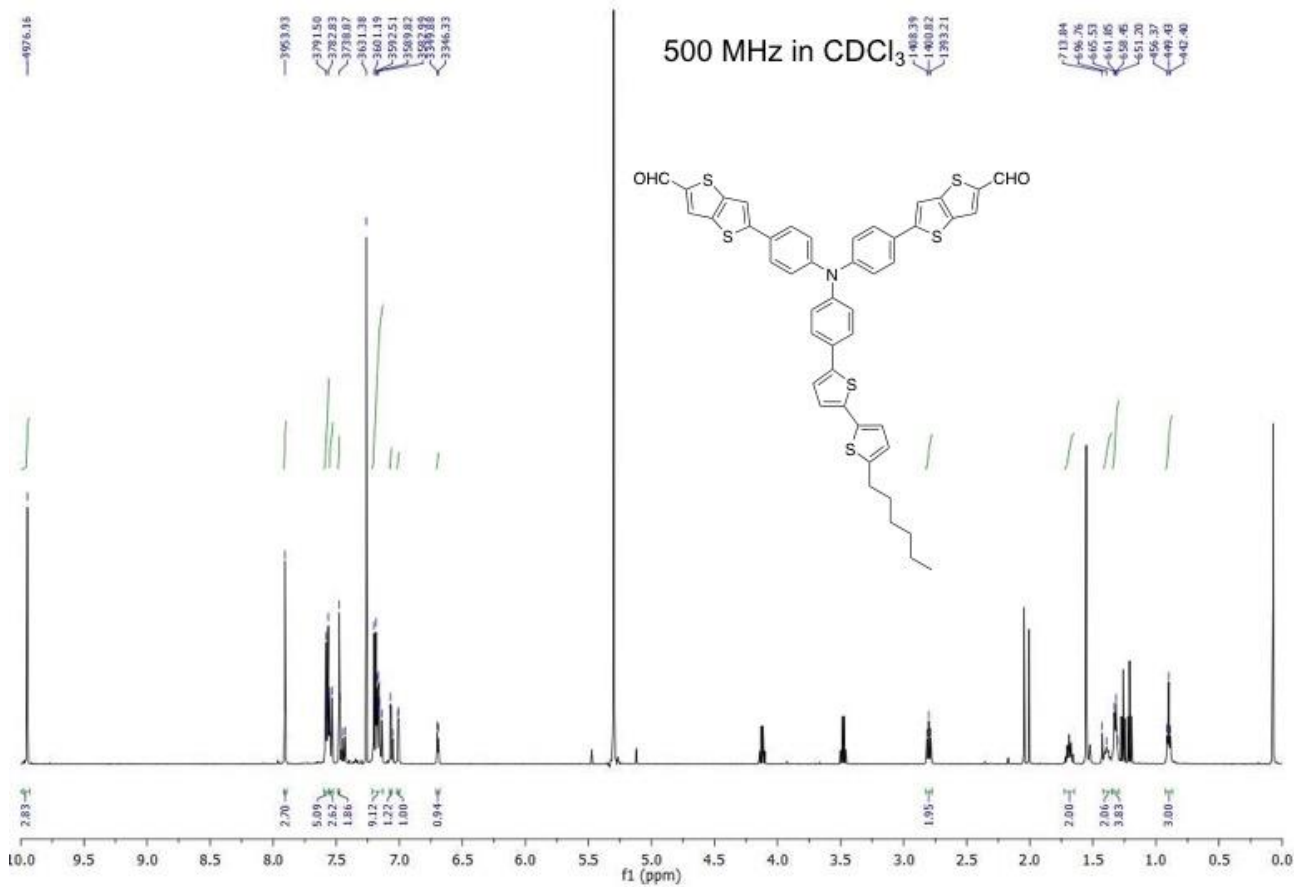



9.95

7.90  
7.57  
7.52  
7.51  
7.47  
7.26  
7.22  
7.20  
7.18  
6.58  
6.56  
6.55

500 MHz in CDCl<sub>3</sub>

3.00  
3.98  
3.97

1.82  
1.79  
1.78  
1.76  
1.75  
1.73  
1.57  
1.48  
1.43  
1.36  
1.35  
1.32  
1.31  
1.30  
0.93  
0.92  
0.89  
0.88  
0.86

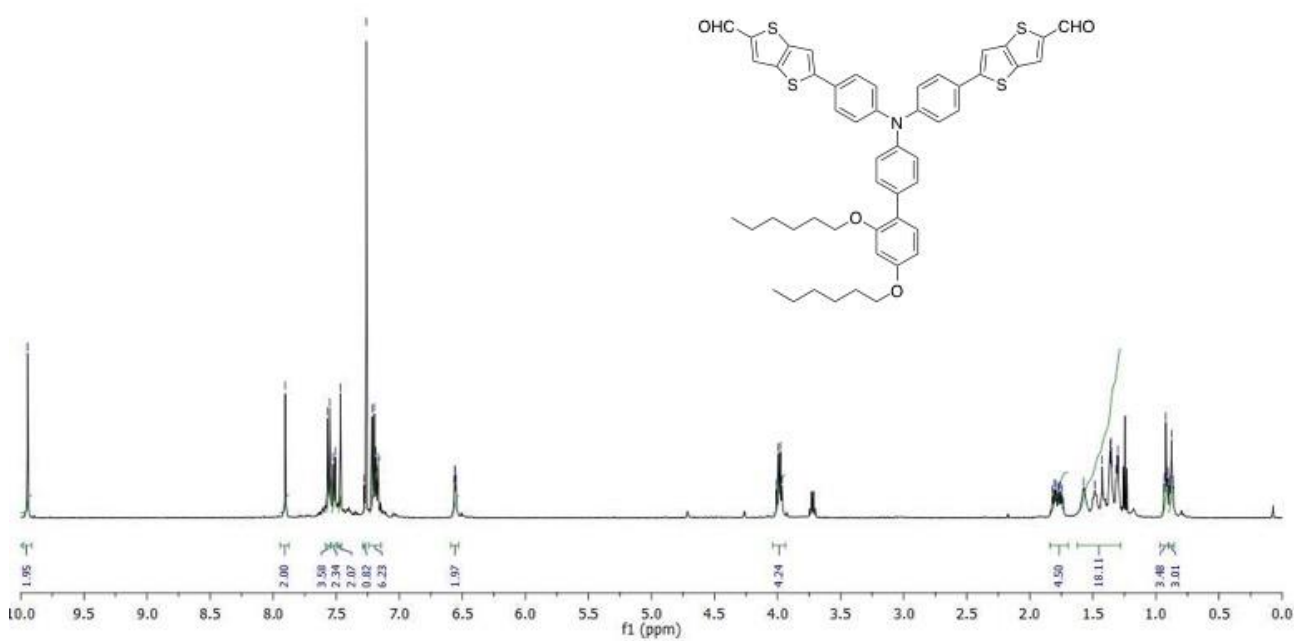

4288.87  
4164.00  
3991.50  
3866.41  
3857.72  
3718.77  
3710.52  
3703.07  
3616.41  
3610.01  
3605.86  
3598.99  
3593.25  
3571.91  
3562.77

500 MHz in DMSO-d<sub>6</sub>

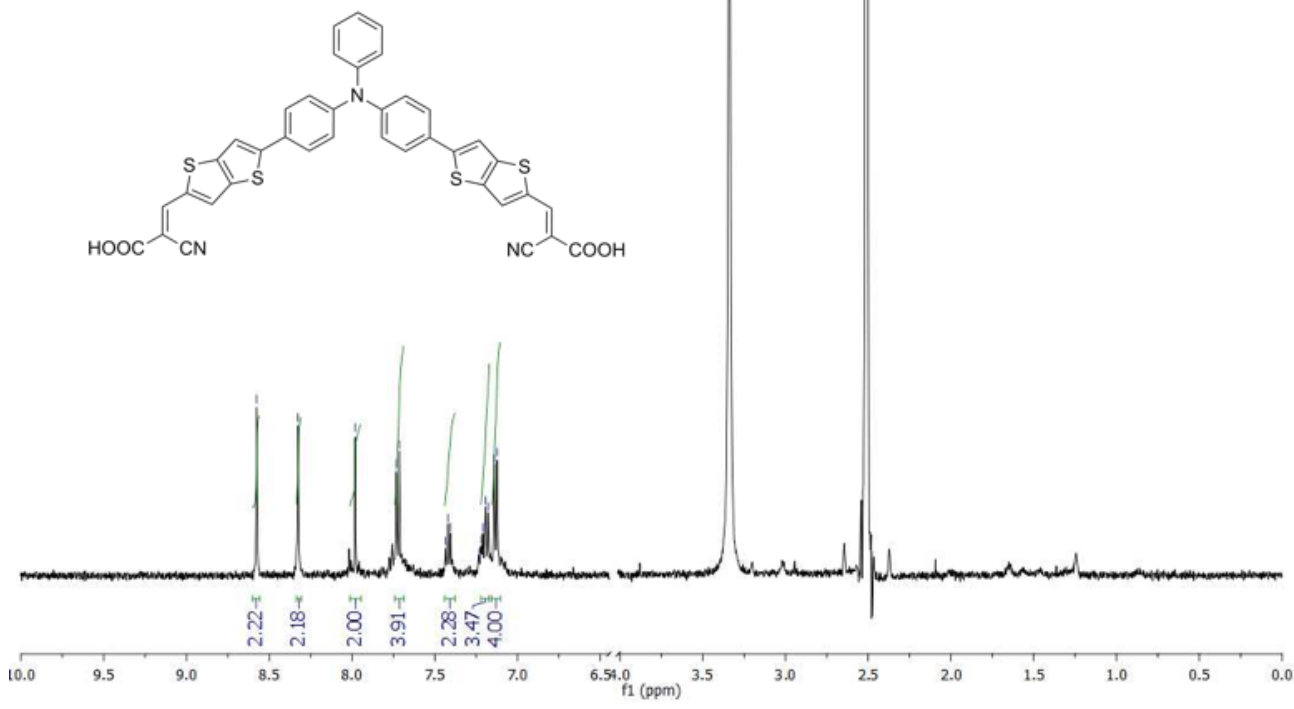

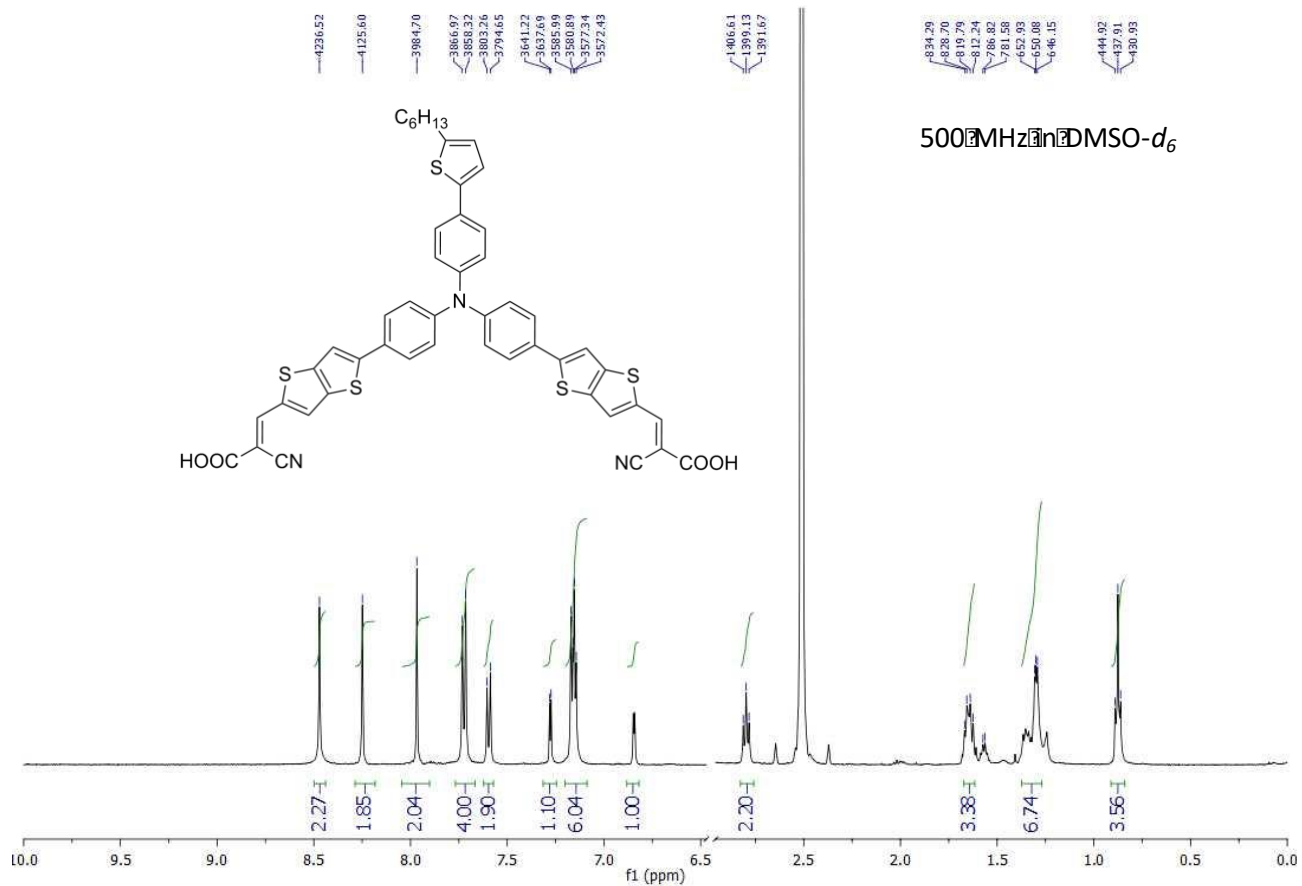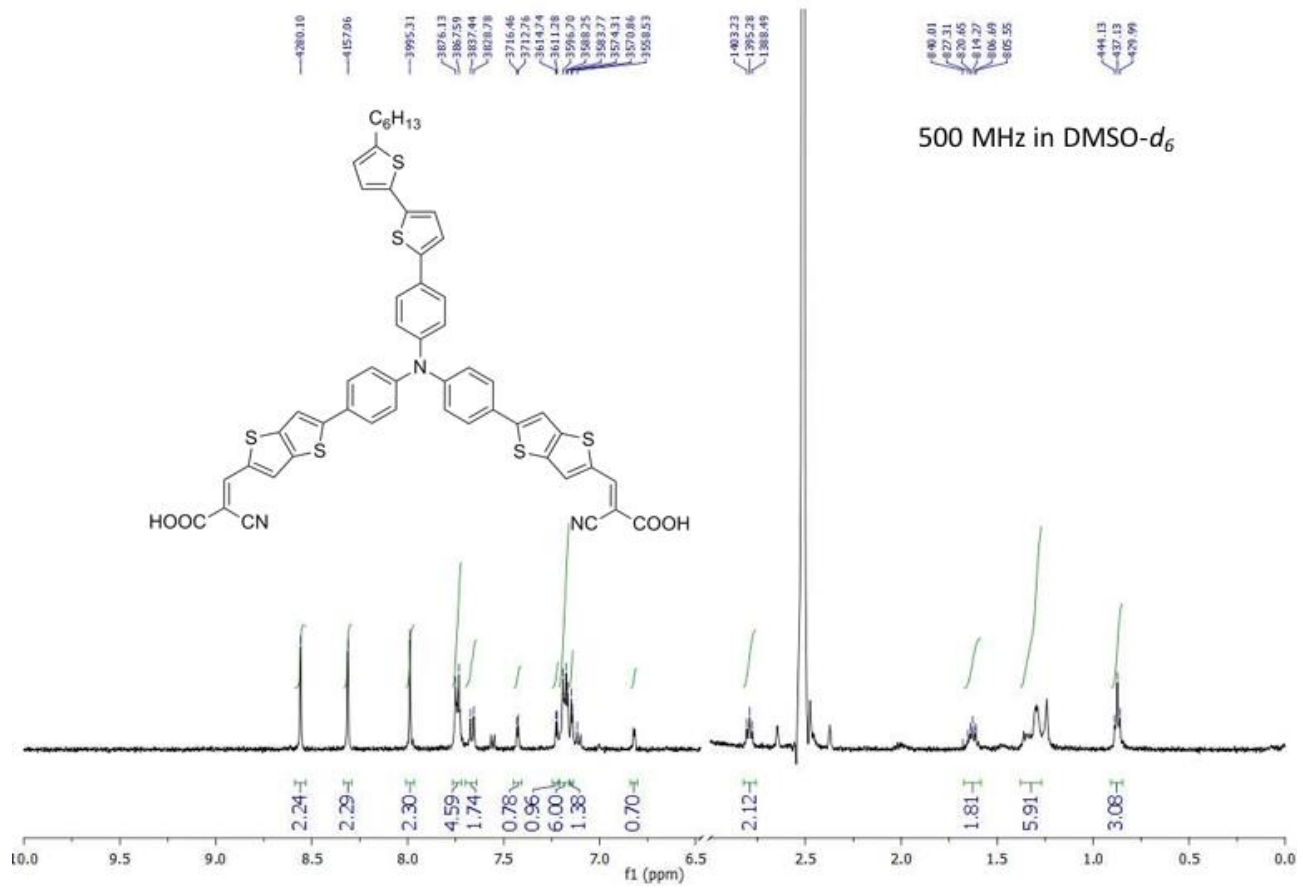

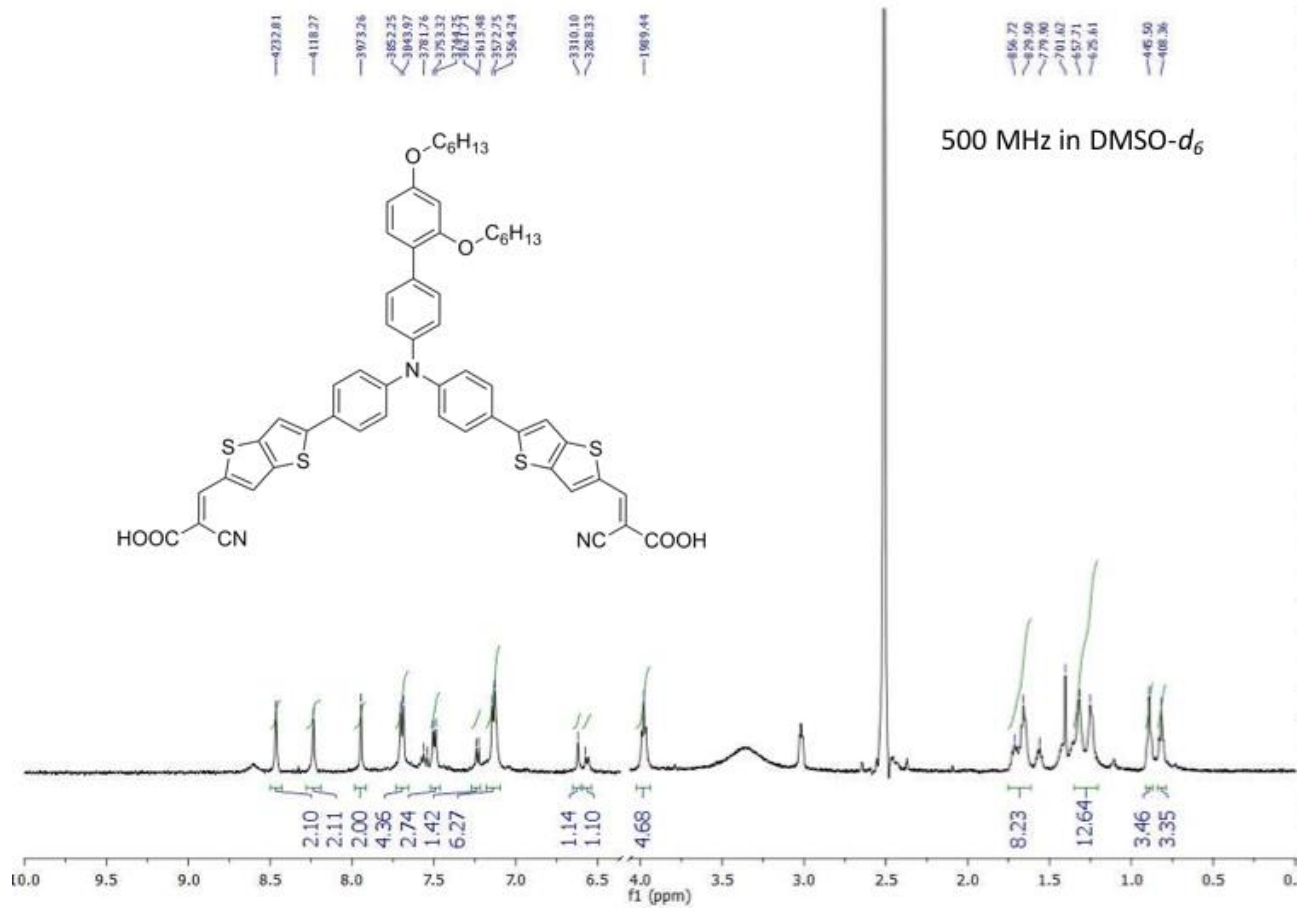

Supplement: c7nj05188c1.pdf [file c7nj05188c1.pdf]
